# Supplementary material for: Condition-Dependent Coordination and Peroxidase Activity of Hemin-Aβ Complexes
Source: MDPI journal article supplement (doi:10.3390/molecules25215044), 2020-10-30
Supplement: s1 [file s1]

# Condition-dependent coordination and peroxidase activity of hemin- $A\beta$ complexes

Chiara Bacchella,<sup>1,†</sup> James T. Brewster, II,<sup>2,†</sup> Steffen Bähring,<sup>3,\*</sup> Simone Dell'Acqua,<sup>1</sup> Harrison D. Root,<sup>2</sup> Gregory D. Thiabaud,<sup>2</sup> James F. Reuther,<sup>2,4</sup> Enrico Monzani,<sup>1</sup> Jonathan L. Sessler<sup>2,\*</sup>, and Luigi Casella<sup>1,\*</sup>

<sup>1</sup> Department of Chemistry, University of Pavia, Via Taramelli 12, 27100 Pavia, Italy

<sup>2</sup> Department of Chemistry, The University of Texas at Austin, 105 East 24th, Street-Stop A5300, Austin, Texas 78712-1224, United States of America

<sup>3</sup> Department of Physics, Chemistry, and Pharmacy, University of Southern Denmark, Campusvej 55, Odense, DK-5230, Denmark

<sup>4</sup> Department of Chemistry, University of Massachusetts Lowell, Lowell, MA 01854, United States of America

\* Correspondence: [sbahring@sdu.dk](mailto:sbahring@sdu.dk) (S.B.); [seessler@cm.utexas.edu](mailto:seessler@cm.utexas.edu) (J.L.S.); [luigi.casella@unipv.it](mailto:luigi.casella@unipv.it) (L.C.)

† These authors contributed equally.

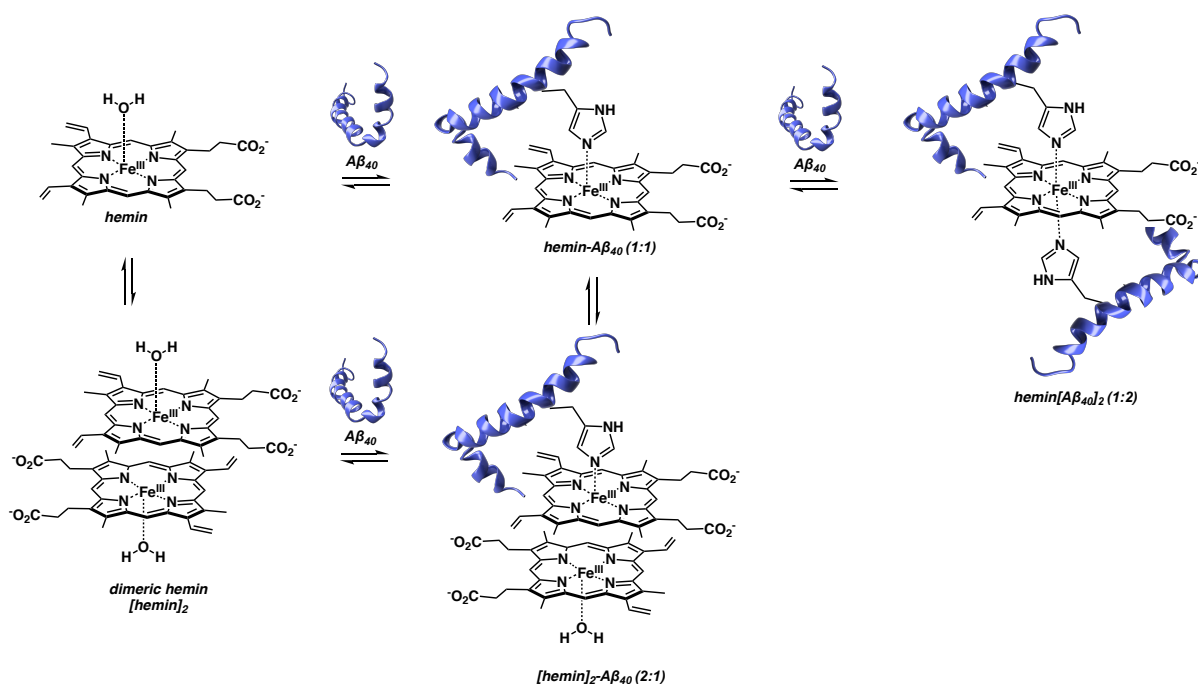

**Scheme S1.** Proposed equilibria between hemin, dimeric  $[hemin]_2$ , dimeric  $[hemin]_2-A\beta_{40}$  (2:1), hemin- $A\beta_{40}$  (1:1), and hemin( $A\beta_{40}$ )<sub>2</sub> (1:2).

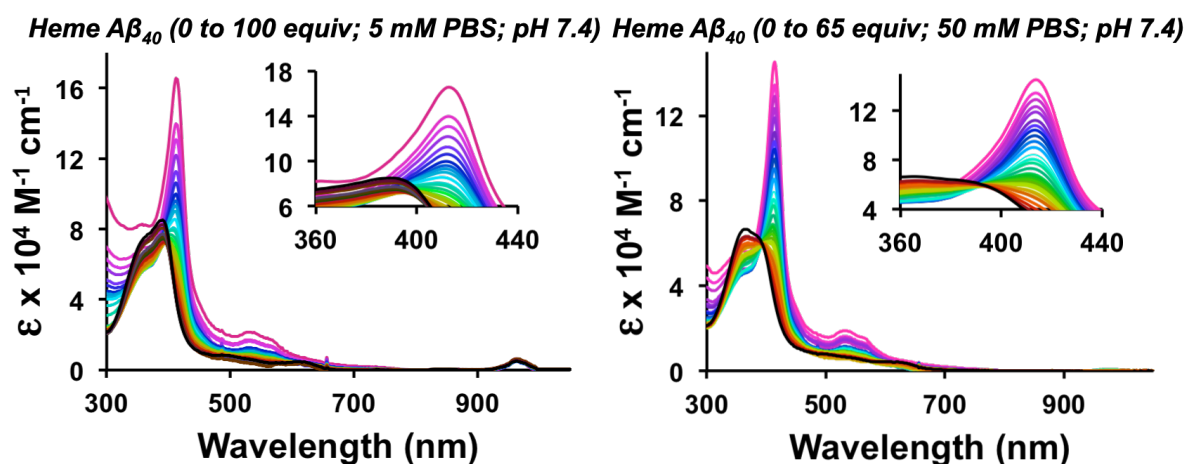

**Figure S1.** Hemin-A $\beta_{40}$  spectroscopic titrations carried out in 5 mM phosphate buffer solution (left) and 50 mM phosphate buffer solution (right).

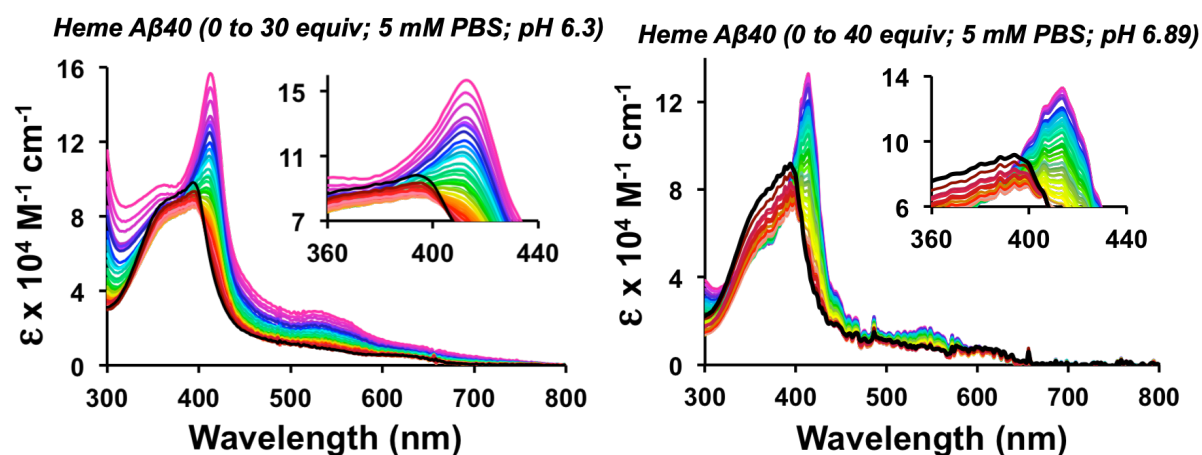

**Figure S2.** Hemin-A $\beta_{40}$  spectroscopic titrations carried out at pH 6.3 (left) and 6.89 (right) phosphate buffer solution (5 mM).

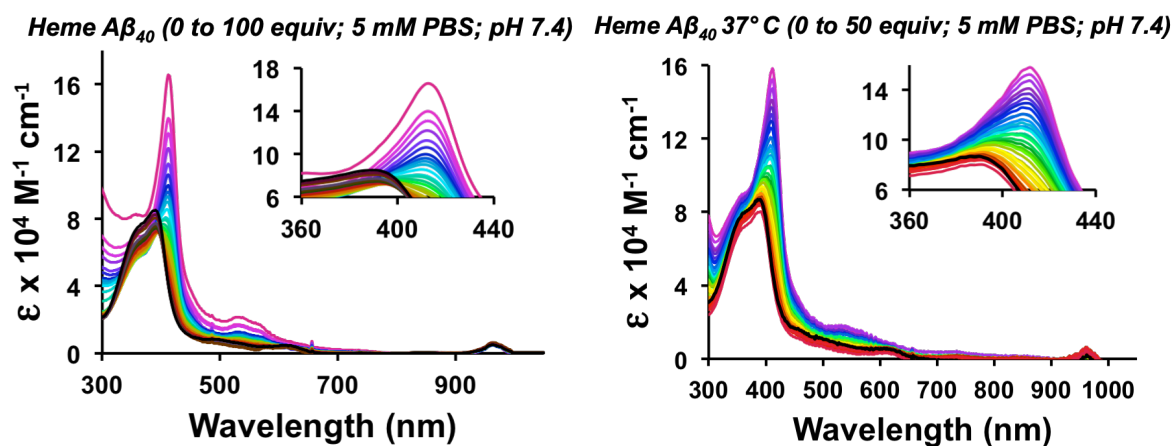

**Figure S3.** Hemin-A $\beta_{40}$  spectroscopic titrations carried out at (left) room temperature and (right) 37 °C in 5 mM phosphate buffer solution.

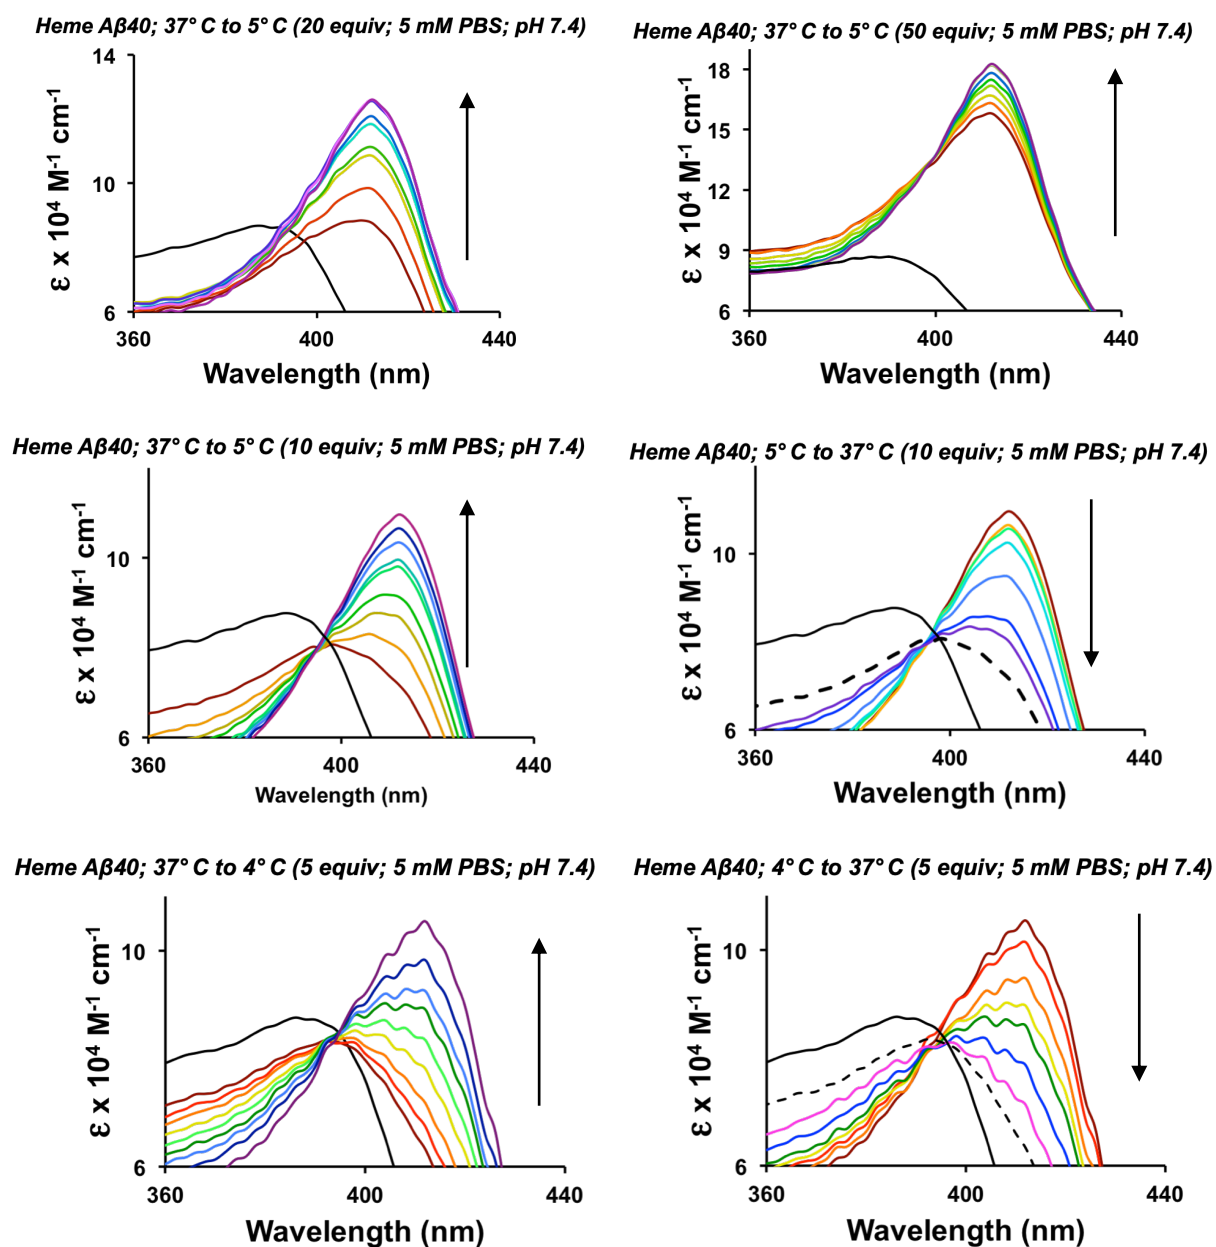

**Figure S4.** Temperature dependent reversibility of the hemin-A $\beta$ <sub>40</sub> complex formation as inferred from UV-vis spectroscopic studies in 5 mM phosphate buffer solution.

**A $\beta$ 40 Aggregate ABTS Oxidation (50 mM PBS; 37° C)**

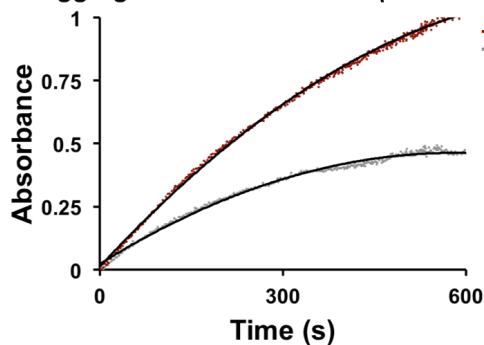

**Figure S5.** Reactivity (ABTS oxidation) of the A $\beta$ <sub>40</sub> aggregate at pH 6.3 (red) versus pH 7.4 (grey) phosphate buffer solution (50 mM) as determined by monitoring the absorption intensity at 660 nm as a function of time.

***A $\beta$ <sub>40</sub> Aggregate ABTS Oxidation (pH 7.4, 50 mM PBS; 37° C)***

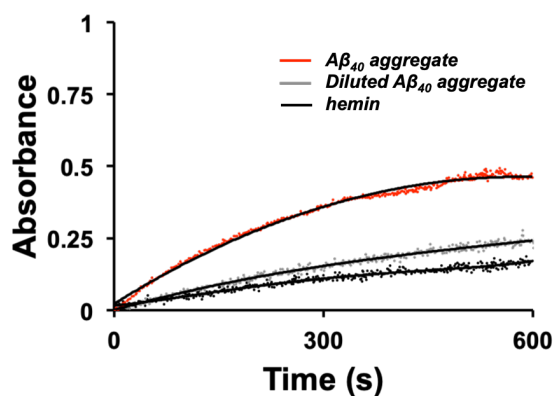

**Figure S6.** Reactivity (ABTS oxidation) of the A $\beta$ <sub>40</sub> aggregate (red) versus diluted aggregate (grey) and hemin (black) as determined by monitoring the absorption intensity at 660 nm as a function of time in pH 7.4 phosphate buffer solution (50 mM).

***A $\beta$ <sub>40</sub> Aggregate Heme Uptake (50 mM PBS; 37° C)***

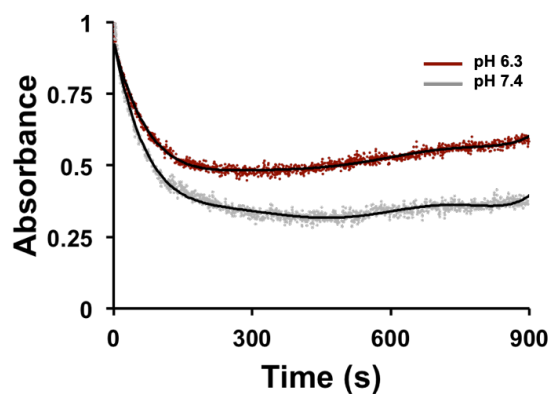

***Heme A $\beta$ <sub>40</sub> Uptake (50 mM PBS; 37° C, pH 6.3)***

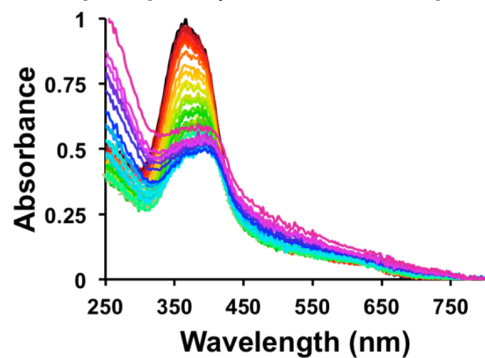

***Heme A $\beta$ <sub>40</sub> Uptake (50 mM PBS; 37° C, pH 7.4)***

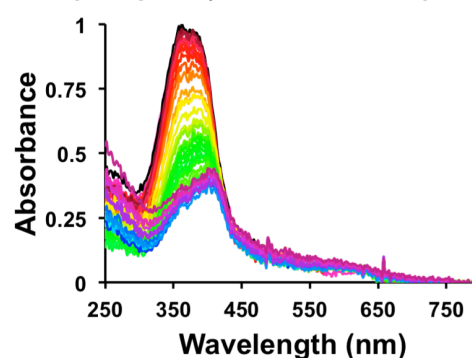

**Figure S7.** (top) Hemin uptake within A $\beta$ <sub>40</sub> aggregates at pH 6.3 (red) and 7.4 (grey) phosphate buffer solution (50 mM) at 660 nm and (bottom) UV-vis traces following the change absorption within the A $\beta$ <sub>40</sub> aggregate as a function of time starting at  $t = 0$  (black) and ending at  $t = 900$  s (purple).



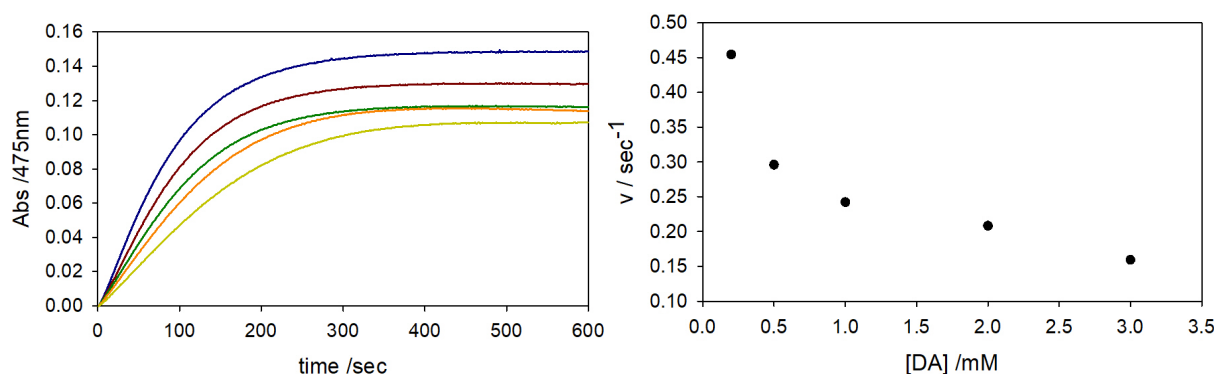

**Figure S8.** (Left) Kinetic profile of DA oxidation with time in 50 mM phosphate buffer solution at pH 7.5 and 37 °C in presence of hemin (2  $\mu$ M), hydrogen peroxide (2.5 mM), A $\beta$ <sub>16</sub> (10  $\mu$ M), and varying concentration of DA (0.2 mM, blue trace; 0.5 mM, brown; 1 mM, green; 2 mM, orange and 3 mM, light green) as determined by monitoring the absorption intensity at 475 nm as a function of time. (Right) Dependence of the reaction rate of dopaminochrome formation on the concentration of DA.

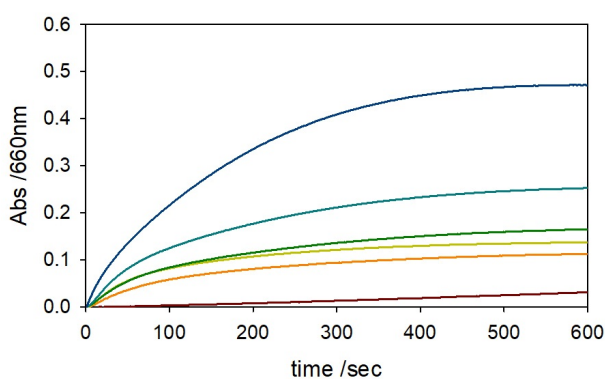

**Figure S9.** Kinetic profile of ABTS (3 mM) oxidation with time in 50 mM phosphate buffer solution at pH 7.4 and 37 °C in presence of hydrogen peroxide (2.5 mM) (brown trace) and hemin (2  $\mu$ M, orange) and upon the addition of 2  $\mu$ M (light green), 10  $\mu$ M (green), 40  $\mu$ M (light blue) and 200  $\mu$ M A $\beta$ <sub>16</sub> (blue) as determined by monitoring the absorption intensity at 660 nm as a function of time.

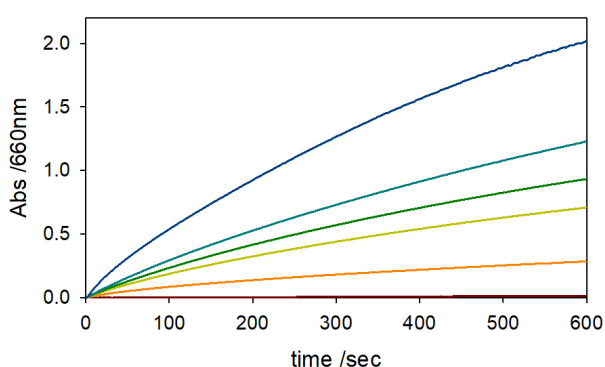

**Figure S10.** Kinetic profile of ABTS (3 mM) oxidation with time in 50 mM phosphate buffer solution at pH 6.3 and 37 °C in presence of hydrogen peroxide (2.5 mM) (brown trace) and hemin (2  $\mu$ M, orange) and upon the addition of 2  $\mu$ M (light green), 10  $\mu$ M (green), 40  $\mu$ M (light blue) and 200  $\mu$ M A $\beta$ <sub>16</sub> (blue) as determined by monitoring the absorption intensity at 660 nm as a function of time.

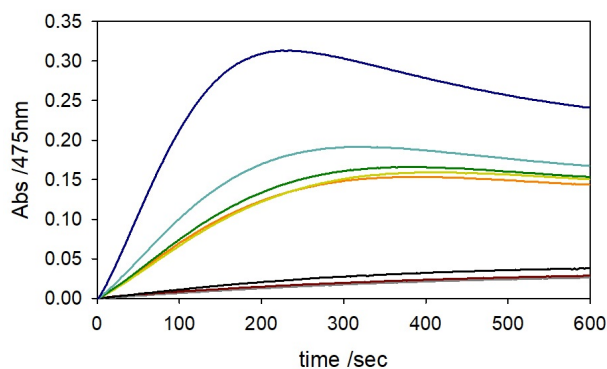

**Figure S11.** Kinetic profile of DA (3 mM) oxidation with time in 50 mM phosphate buffer solution at pH 7.4 and 37 °C in presence of hemin (2  $\mu$ M) (brown trace) or hydrogen peroxide (2.5 mM, black), after the addition of both hemin and peroxide (orange) and upon the addition of A $\beta$ <sub>16</sub> at 2  $\mu$ M (light green), 10  $\mu$ M (green), 40  $\mu$ M (light blue) and 200  $\mu$ M (blue) as determined by monitoring the absorption intensity at 475 nm as a function of time. The autoxidation trace is shown as grey curve.

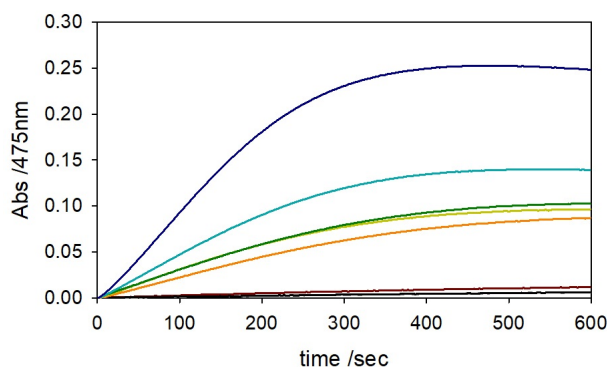

**Figure S12.** Kinetic profile of DA (3 mM) oxidation with time in 50 mM phosphate buffer solution at pH 6.3 and 37 °C in presence of hemin (2  $\mu$ M) (brown trace) or hydrogen peroxide (2.5 mM, black), after the addition of both hemin and peroxide (orange) and upon the addition of A $\beta$ <sub>16</sub> 2  $\mu$ M (light green), 10  $\mu$ M (green), 40  $\mu$ M (light blue) and 200  $\mu$ M (blue) as determined by monitoring the absorption intensity at 475 nm as a function of time. The autoxidation trace is shown as grey curve.

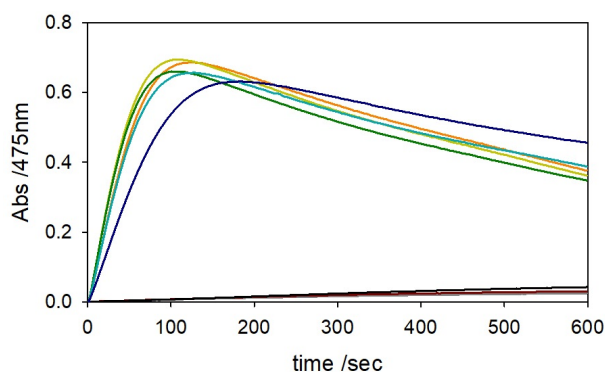

**Figure S13.** Kinetic profile of DA (3 mM) oxidation with time in 50 mM phosphate buffer solution at pH 6.3 and 37 °C in presence of hemin-glycyl-L-histidine methyl ester (hemin-GH) (2  $\mu$ M) (brown trace) or hydrogen peroxide (2.5 mM, black), after the addition of both hemin-GH and hydrogen peroxide (orange) and upon the addition of 2  $\mu$ M (light green), 10  $\mu$ M (green), 40  $\mu$ M (light blue) and 200  $\mu$ M A $\beta$ <sub>16</sub> (blue) as determined by monitoring the absorption intensity at 475 nm as a function of time. The autoxidation trace is shown as a grey curve.

**Table S1.** Kinetic constants for the oxidation of DA ( $\lambda = 470$  nm;  $\varepsilon = 3300$  M<sup>-1</sup>cm<sup>-1</sup>)d by hydrogen peroxide and hemin-glycyl-L-histidine methyl ester (hemin-GH) with varying amounts of A $\beta_{16}$  according to the following conditions: hemin-GH (2  $\mu$ M), DA (3 mM), H<sub>2</sub>O<sub>2</sub> (2.5 mM) in pH 6.3 phosphate buffer solution (50 mM) at 37 °C. The calculated variability for all cases was equal to or less than 0.001 s<sup>-1</sup> as based on at least 2 repeat measurements

| Species                     | $k_{obs}$ [s <sup>-1</sup> ] |
|-----------------------------|------------------------------|
| Hemin-GH                    | 0.785                        |
| A $\beta_{16}$ (1 equiv.)   | 0.819                        |
| A $\beta_{16}$ (5 equiv.)   | 0.824                        |
| A $\beta_{16}$ (20 equiv.)  | 0.773                        |
| A $\beta_{16}$ (100 equiv.) | 0.501                        |

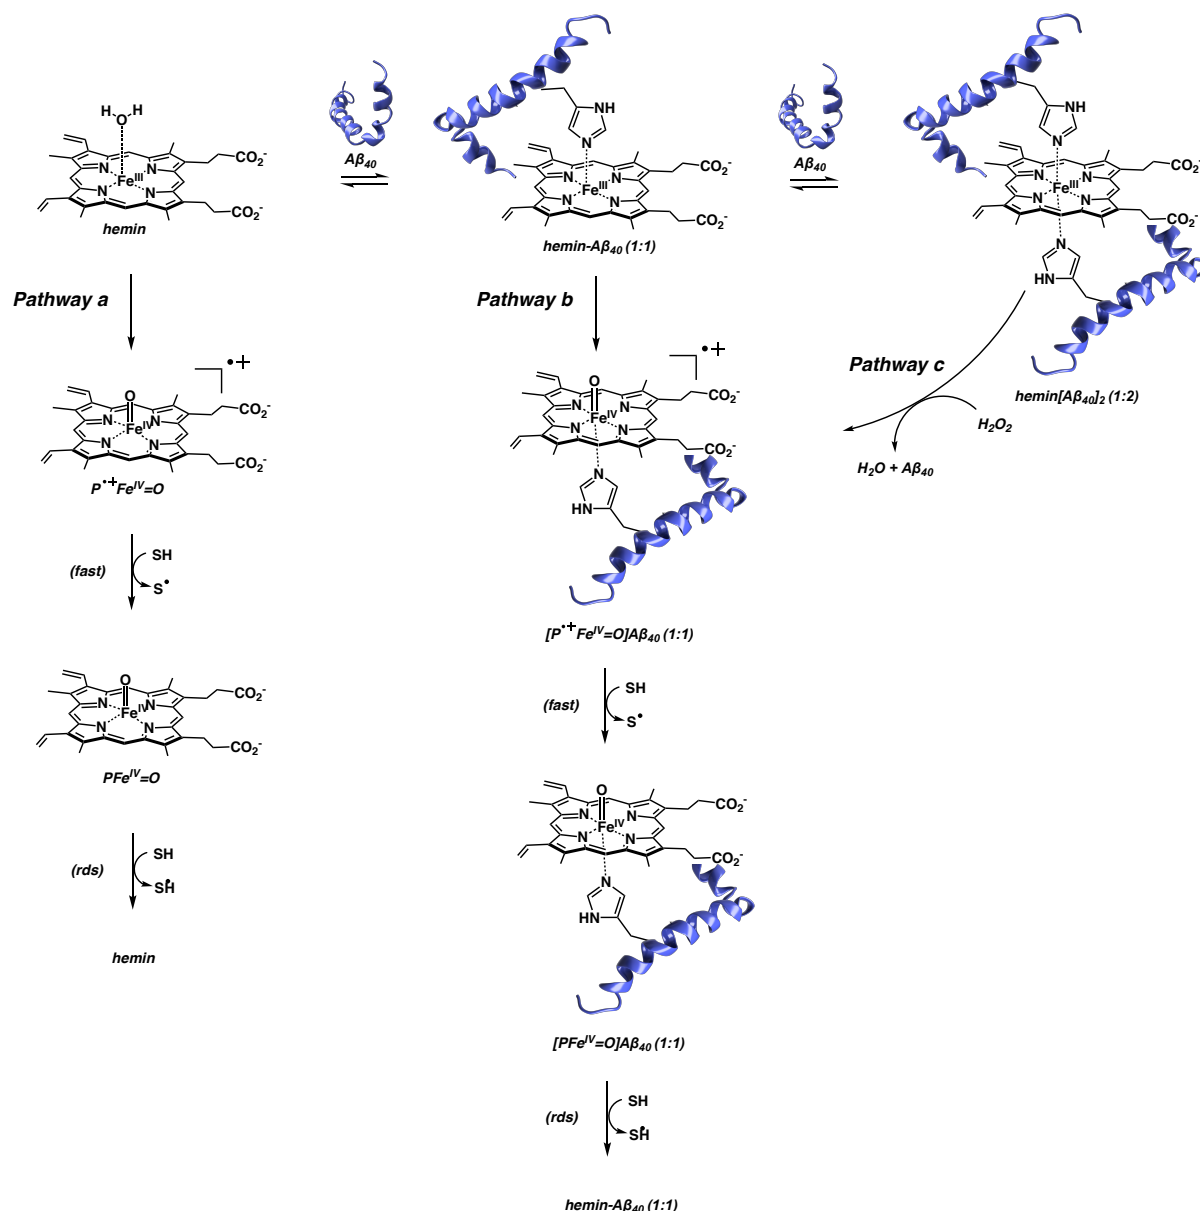

**Scheme S2.** Proposed reaction mechanism explaining the observed peroxidase-like reactivity of hemin-A $\beta_{40}$  complexes.  $K_1$  and  $K_2$  are the equilibrium constants for heme binding to one and two equivalents of A $\beta_{40}$  or A $\beta_{16}$ , respectively, and SH is a generic substrate. Path *a*, path *b*, and path *c* indicate the reaction mechanism of H<sub>2</sub>O<sub>2</sub> with free hemin, [hemin(A $\beta$ )] complex and [hemin(A $\beta$ )<sub>2</sub>] complex, respectively.

**Table S2.** Modification of A $\beta$ <sub>16</sub> peptide as inferred from HPLC-MS analysis observed upon reaction of hemin (6  $\mu$ M), A $\beta$ <sub>16</sub> (30  $\mu$ M), hydrogen peroxide (1 mM) and DA (3 mM) in pH 7.4 phosphate buffer solution (50 mM) at 37 °C.

| Time (min) | A $\beta$ <sub>16</sub> | +16* | +32 | +48 | +147 | +96 | +80 | Dimer | Fragments |
|------------|-------------------------|------|-----|-----|------|-----|-----|-------|-----------|
| 30         | 79%                     | 1%   | 1%  | 1%  | -    | 6%  | 4%  | 2%    | 6%        |
| 120        | 79%                     | 2%   | 1%  | 2%  | -    | 8%  | 4%  | 2%    | 2%        |

\*O-atom insertion is believed to occur on H<sub>13</sub>

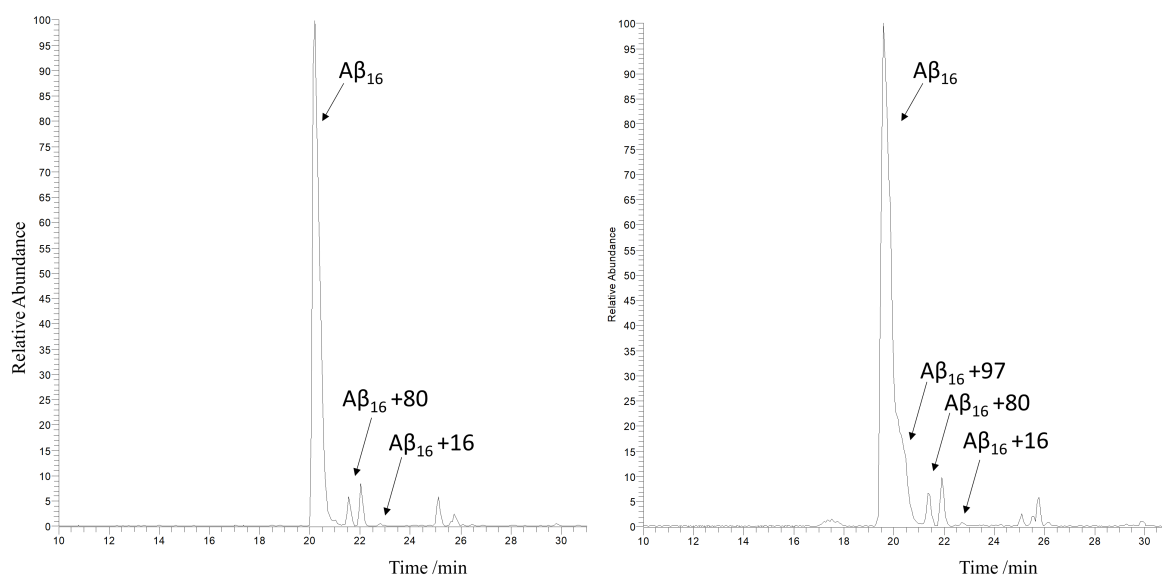

**Figure S14.** HPLC-MS elution profiles of A $\beta$ <sub>16</sub> (30  $\mu$ M) in phosphate buffer solution (50 mM) pH 7.4 in the presence of hemin (6  $\mu$ M), H<sub>2</sub>O<sub>2</sub> (1 mM) and DA (3 mM) after 30 min (left panel) and 120 min (right panel) reaction time at 37 °C.

**Table S3.** Modification of A $\beta$ <sub>16</sub> peptide as inferred from HPLC-MS analysis upon reaction of hemin (6  $\mu$ M), A $\beta$ <sub>16</sub> (30  $\mu$ M) and hydrogen peroxide (1 mM) in phosphate buffer solution (50 mM) pH 7.4 at 37 °C.

| Time (min) | A $\beta$ <sub>16</sub> | +16* | +32 | +48 | +96 | +80 | Dimer | Fragments |
|------------|-------------------------|------|-----|-----|-----|-----|-------|-----------|
| 30         | 85%                     | 3%   | -   | -   | 1%  | 9%  | 2%    | -         |
| 120        | 84%                     | 3%   | 2%  | 1%  | 3%  | 3%  | 3%    | 1%        |

\*The O-atom arises from oxidative modification of Y<sub>10</sub> or H<sub>13</sub>
